# Supplementary material for: Planar Perovskite Solar Cells Using Perovskite CsPbI3 Quantum Dots as Efficient Hole Transporting Layers
Source: MDPI journal article supplement (doi:10.3390/ma15248902), 2022-12-13
Supplement: s1 [file s1]

## Supporting Information

### Planar Perovskite Solar Cells Using Perovskite CsPbI<sub>3</sub> Quantum Dots as Efficient Hole Transporting Layers

Tsair-Chun Liang <sup>1</sup>, Hsin-Yu Su <sup>1</sup>, Sih-An Chen <sup>2,3</sup>, Yen-Ju Chen <sup>4</sup>, Chung-Yu Chiang <sup>2</sup>, Chih-Hsun Chiang <sup>2</sup>, Tzung-Ta Kao <sup>1</sup>, Lung-Chien Chen <sup>2,\*</sup>, Chun-Cheng Lin <sup>3,\*</sup>

1 Institute of Photonics Engineering, National Kaohsiung University of Science and Technology, Kaohsiung 824005, Taiwan

2 Department of Electro-Optical Engineering, National Taipei University of Technology, Taipei City 106344, Taiwan

3 Department of Mathematic and Physical Sciences, R.O.C. Air Force Academy, Kaohsiung 820008, Taiwan

4 Department of Electronic Engineering, Ming Chi University of Technology, New Taipei City 243303, Taiwan

\* Correspondence: ocean@ntut.edu.tw (L.-C.C.); cclincafa@gmail.com (C.-C.L.)

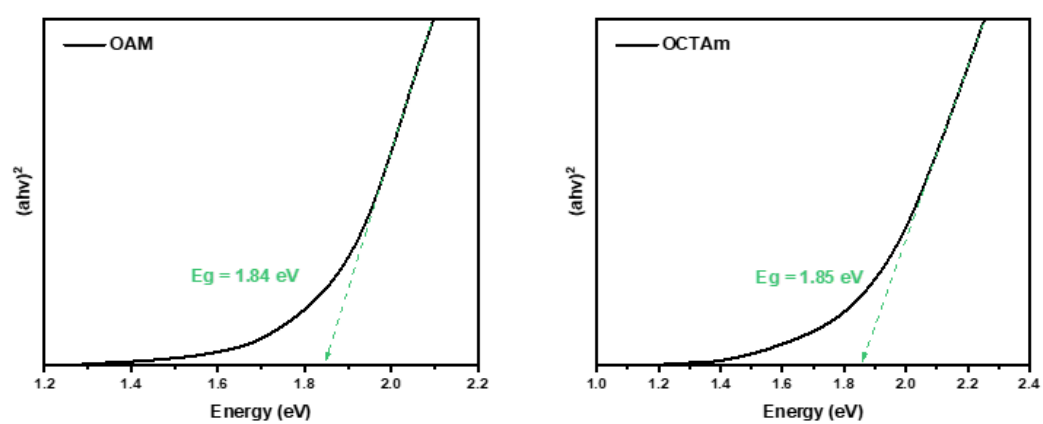

Figure S1. The Tauc's plot of the QDs with OAM and Octam ligands.
